# Supplementary material for: Green synthesis of Illicium verum-derived novel semiconducting Ag/Fe/Cu-trimetallic nanocomposites: A dual-functional platform for selective detection of pharmaceutical compounds and light-independent degradation of organic dyes
Source: Royal Society of Chemistry journal article supplement (doi:10.1039/d6ra02869a), 2026-05-18
Supplement: d6ra02869a1.pdf [file d6ra02869a1.pdf]

## Green Synthesis of *Illicium verum* derived novel semiconducting Ag/Fe/Cu-trimetallic nanocomposites: Dual functional platform for selective detection of pharmaceutical compounds and light independent degradation of organic dye

Ambreen Zia,<sup>a</sup> Ziana Manzar,<sup>a</sup> Syed Nawazish Ali,<sup>\*a,b</sup> Syeda Farah Bukhari,<sup>a</sup> and Imran Malik<sup>c</sup>

<sup>a</sup>Department of Chemistry, University of Karachi, Karachi-75270, Pakistan

<sup>b</sup>Department of Chemistry, NED University of Engineering and Technology, Karachi-75270, Pakistan

<sup>c</sup>Department of Basic Science (Chemistry), Imam Abdulrahman Bin Faisal University, Dammam, Saudi Arabia

\* [syed.nawazish@gmail.com](mailto:syed.nawazish@gmail.com); [snali@uok.edu.pk](mailto:snali@uok.edu.pk)

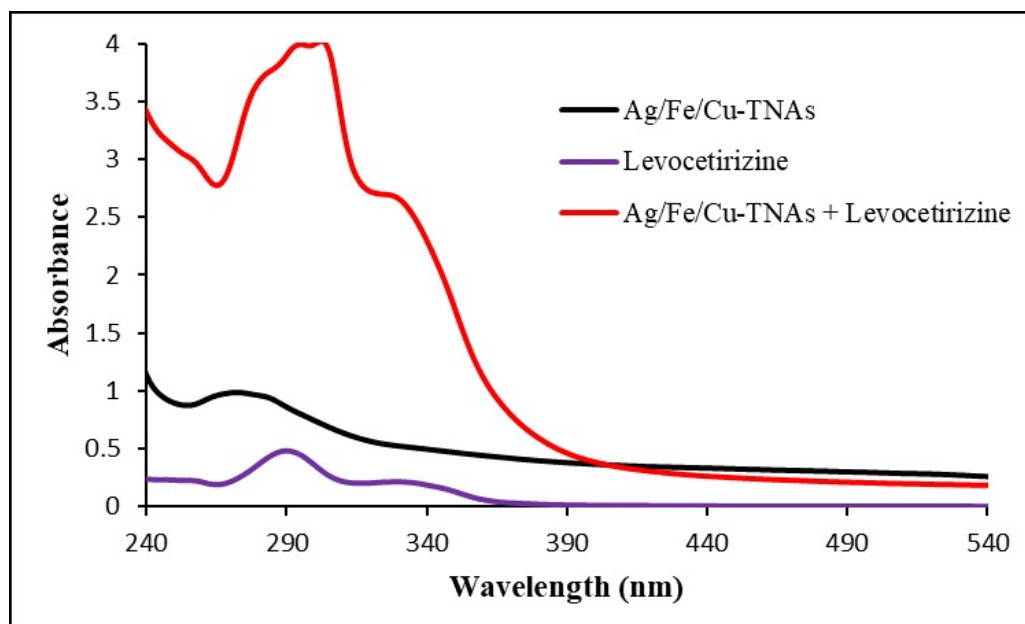

Fig. S1 Comparative UV-Visible spectra of Ag/Fe/Cu-TNAs, Levocetirizine and interaction between them

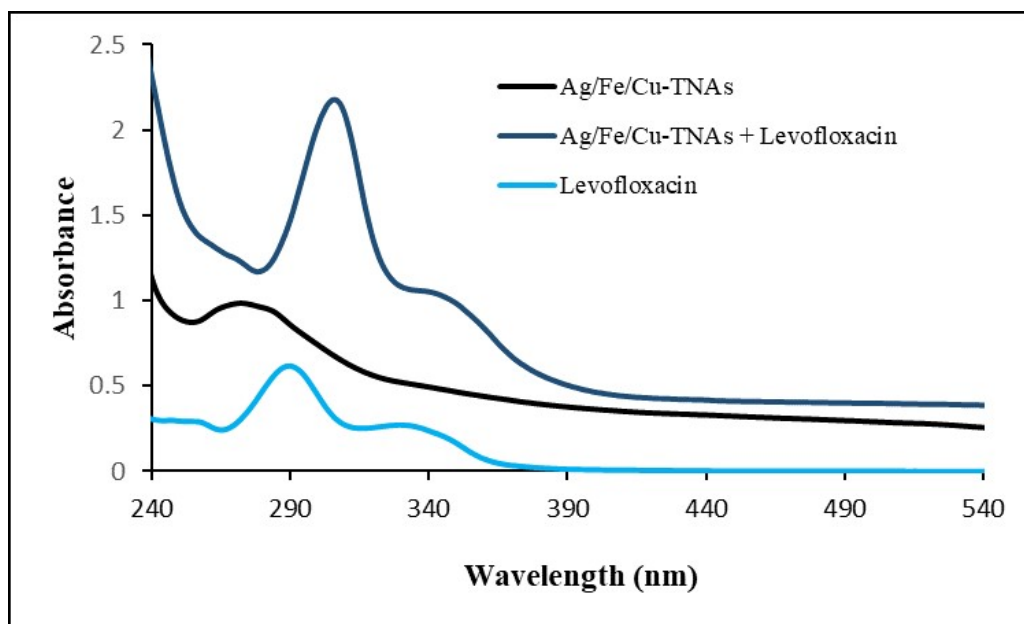

**Fig. S2** Comparative UV-Visible spectra of Ag/Fe/Cu-TNAs, Levofloxacin and interaction between them

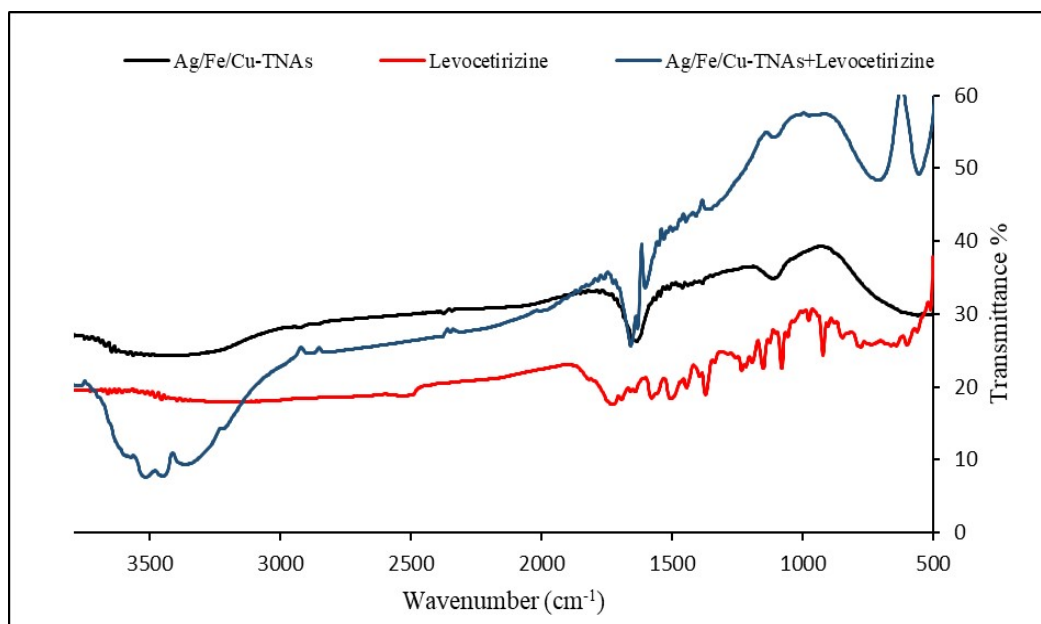

**Fig. S3** Comparative FT-IR spectra of Ag/Fe/Cu-TNAs, Levocetirizine and interaction between them

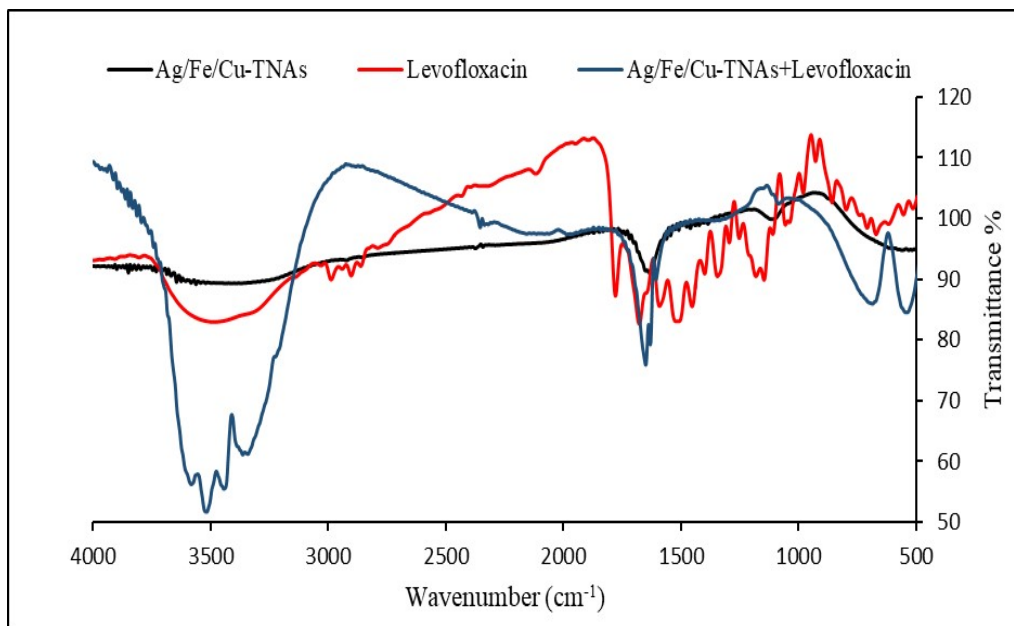

**Fig. S4** Comparative FT-IR spectra of Ag/Fe/Cu-TNAs, Levocetirizine and interaction between them

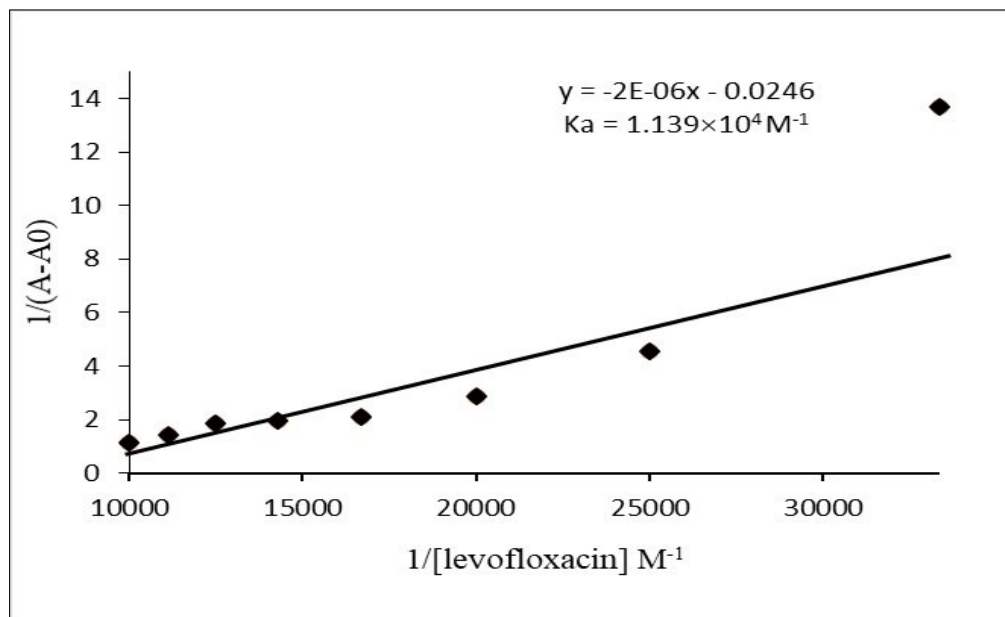

**Fig. S5** Binding constant for the interaction between levofloxacin and Ag/Fe/Cu-TNAs measured by using

Benesi Hildebrand equation

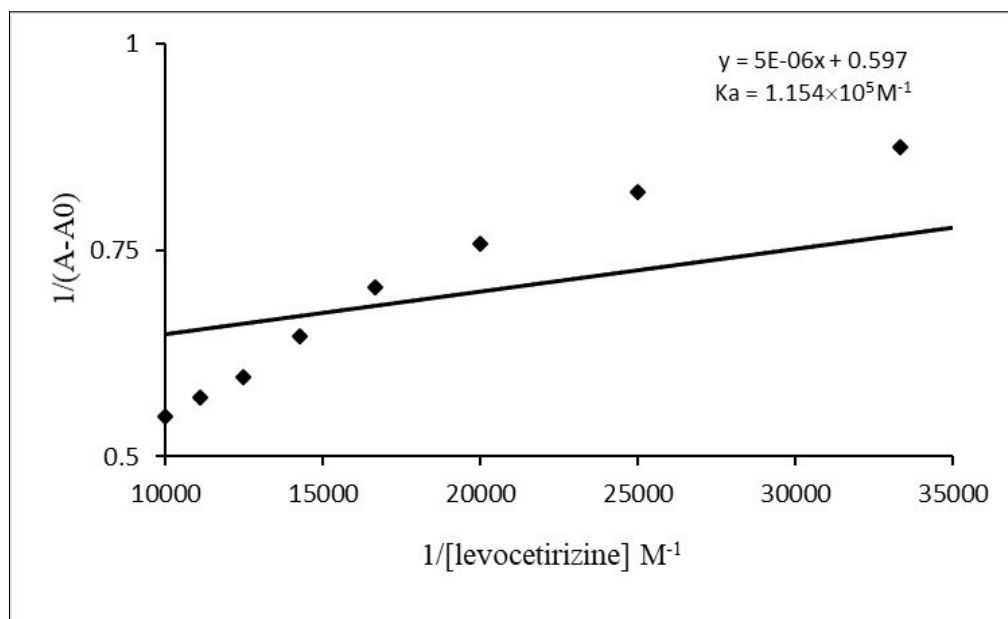

**Fig. S6** Binding constant for the interaction between levocetirizine and Ag/Fe/Cu-TNAs measured by

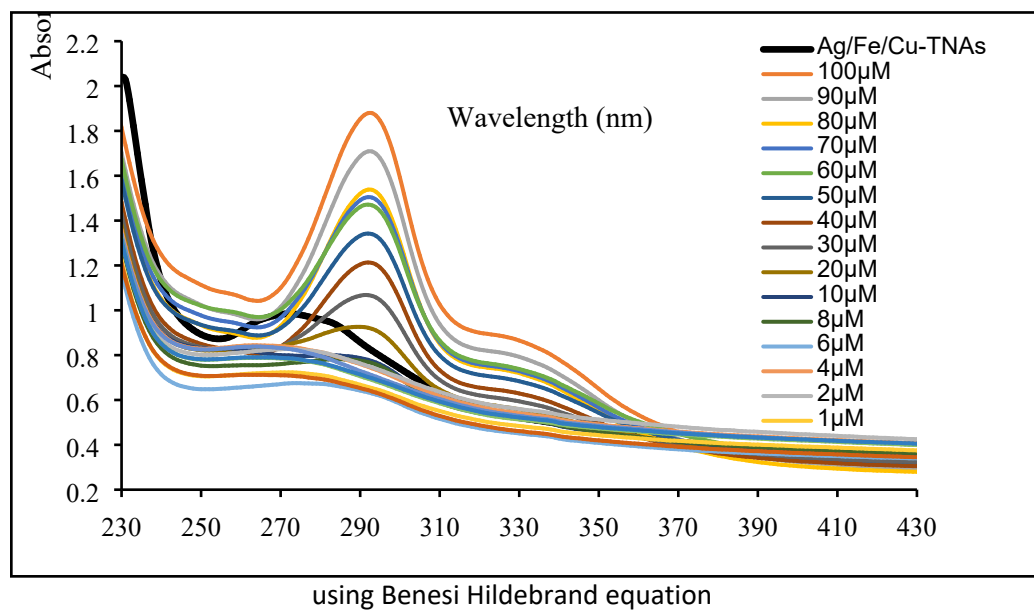

**Fig. S7** Absorbance of levofloxacin-Ag/Fe/Cu-TNAs assembly at decreasing concentrations

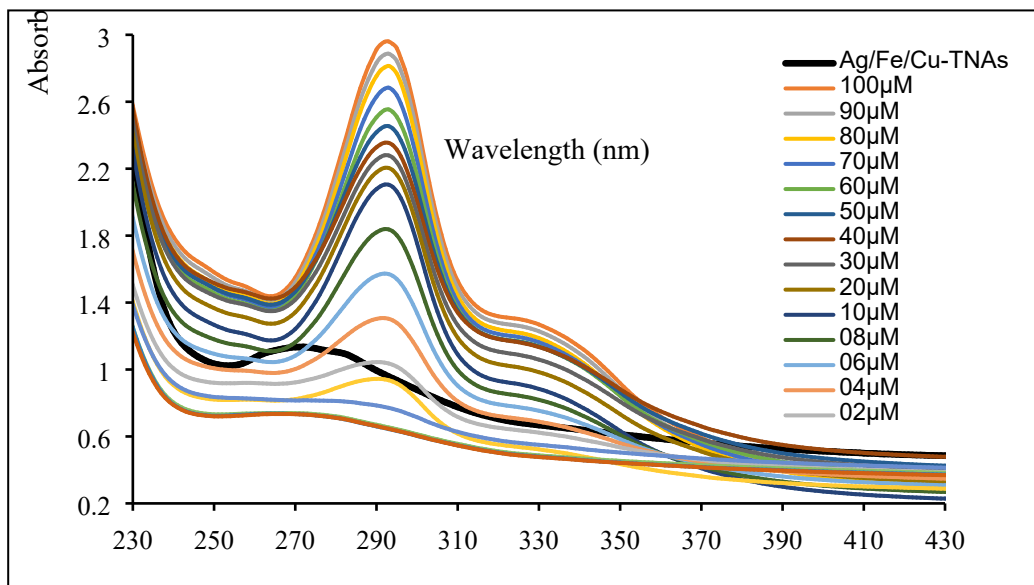

**Fig. S8** Absorbance of levocetirizine-Ag/Fe/Cu-TNAs assembly at decreasing concentrations

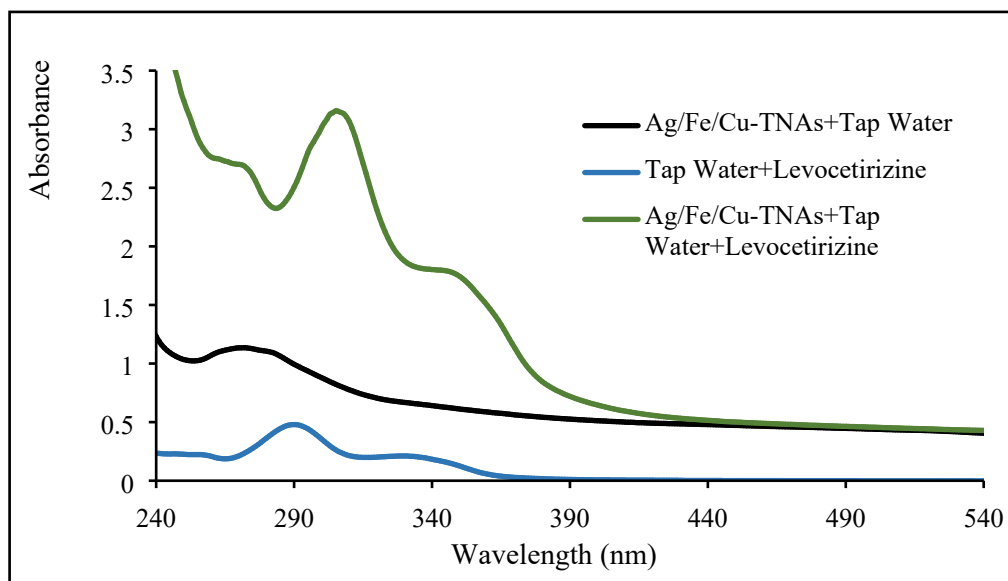

**Fig. S9** Detection of levocetirizine in tap water

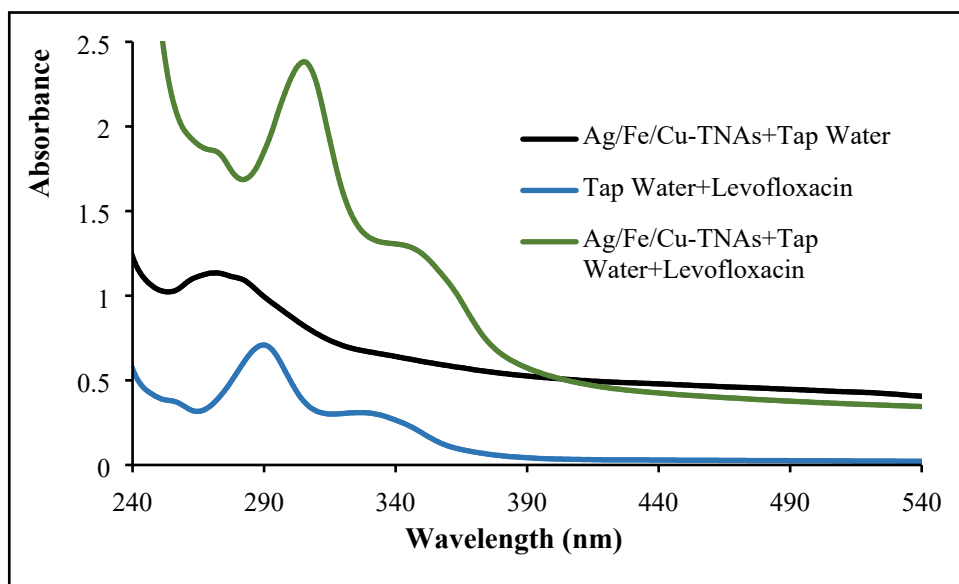

**Fig. S10** Detection of levofloxacin in tap water

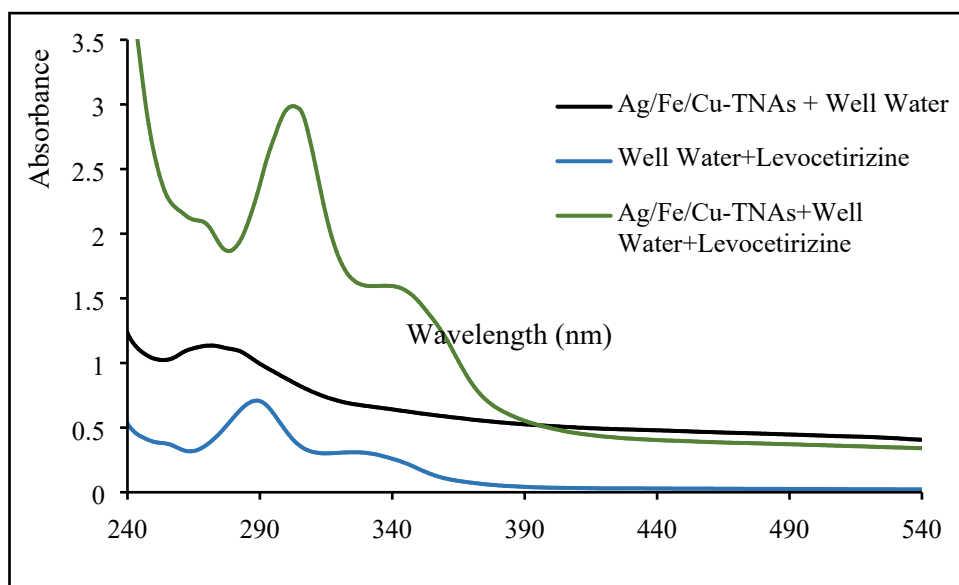

**Fig. S11** Detection of levocetirizine in well water

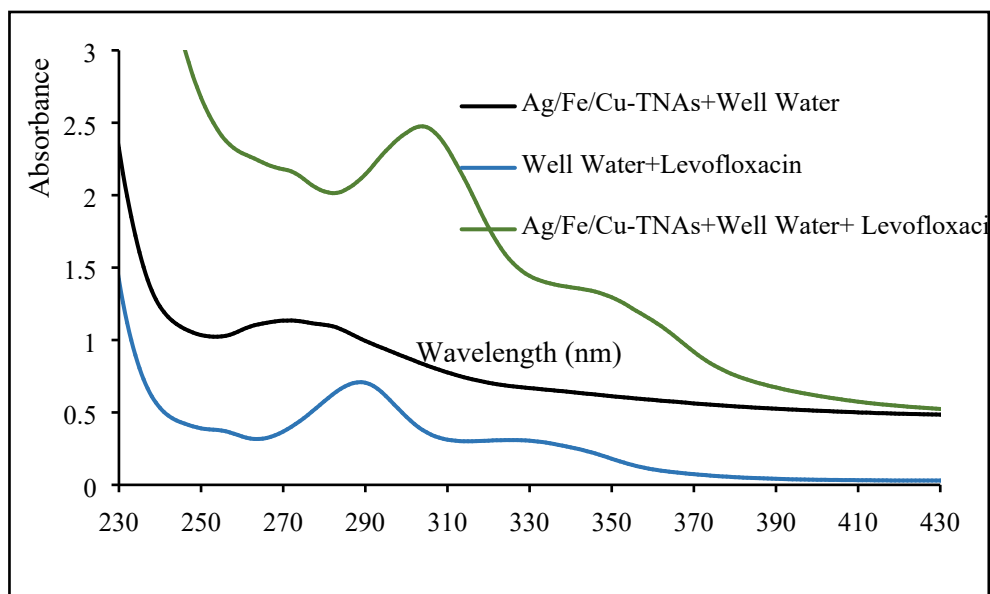

**Fig. S12** Detection of levofloxacin in well water

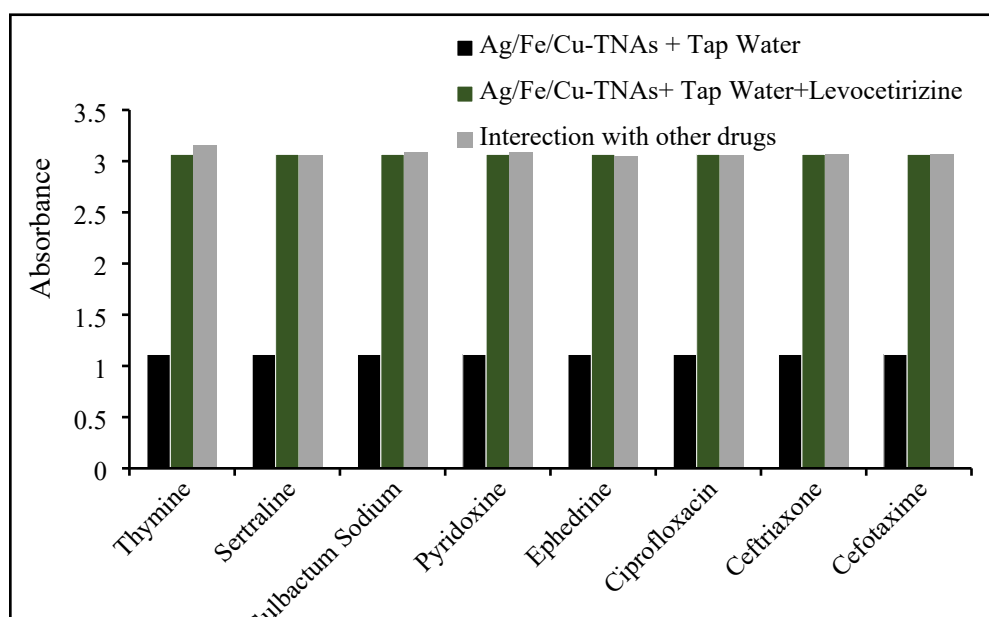

**Fig. S13** Selectivity analysis for levocetirizine in tap water by Ag/Fe/Cu-TNAs

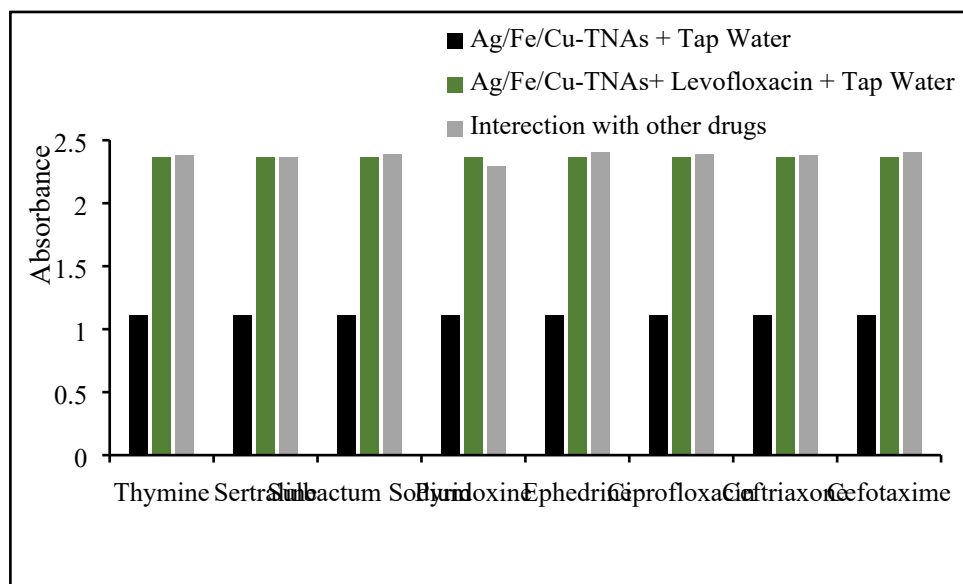

**Fig. S14** Selectivity analysis for levofloxacin in tap water by Ag/Fe/Cu-TNAs

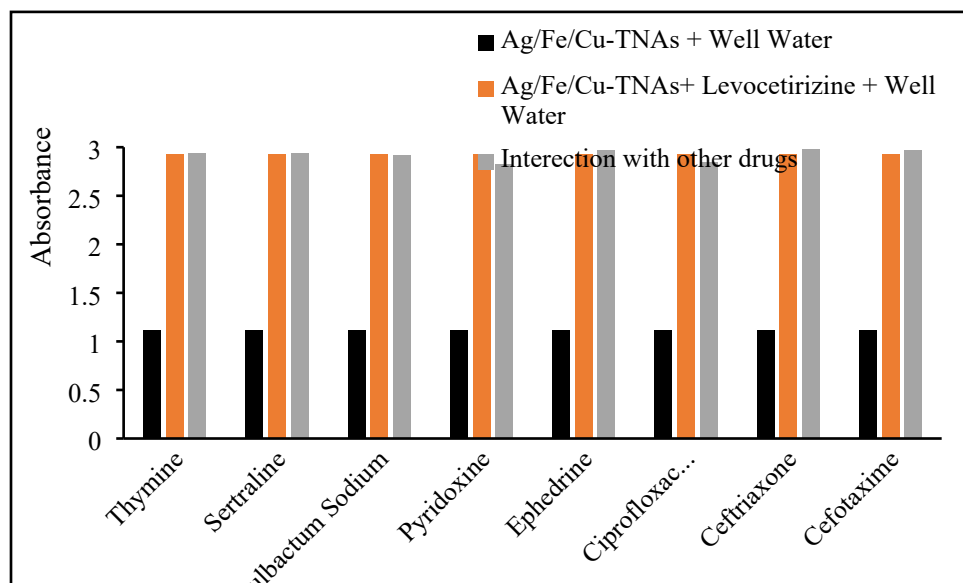

**Fig. S15** Selectivity analysis for levocetirizine in well water by Ag/Fe/Cu-TNAs

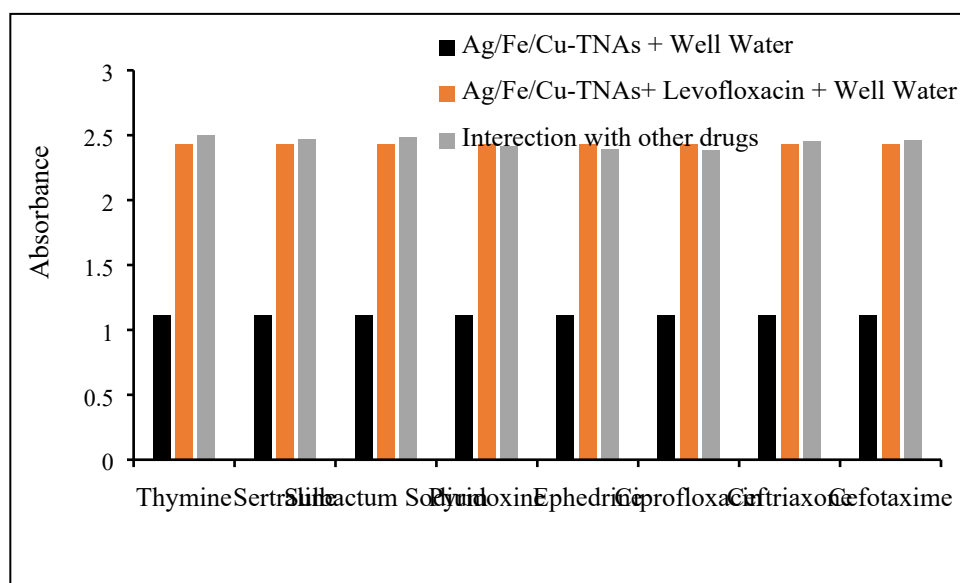

**Fig. S16** Selectivity analysis for levofloxacin in well water by Ag/Fe/Cu-TNAs

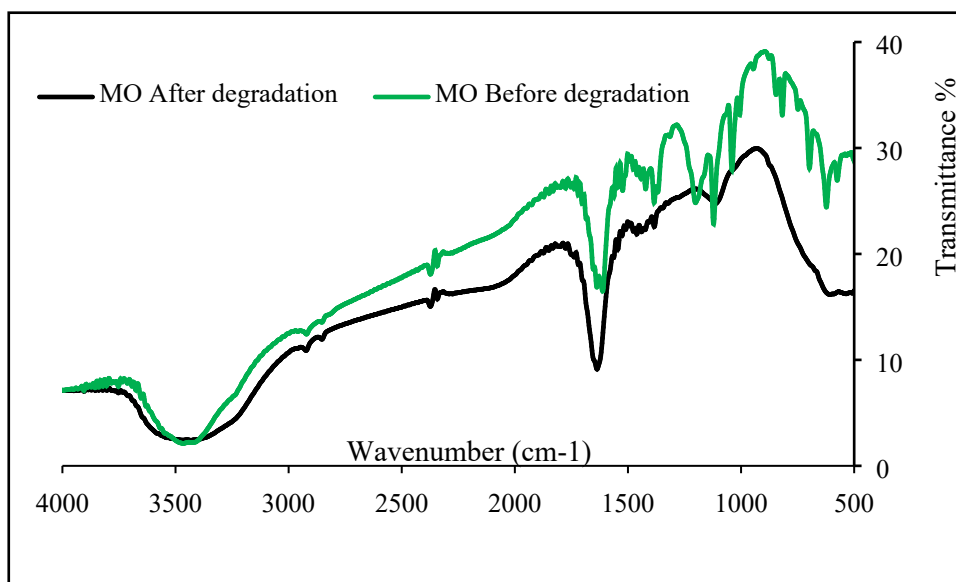

**Fig. S17** Comparative FT-IR spectra of methyl orange before and after degradation in the presence of  $H_2O_2$  and Ag/Fe/Cu-TNAs

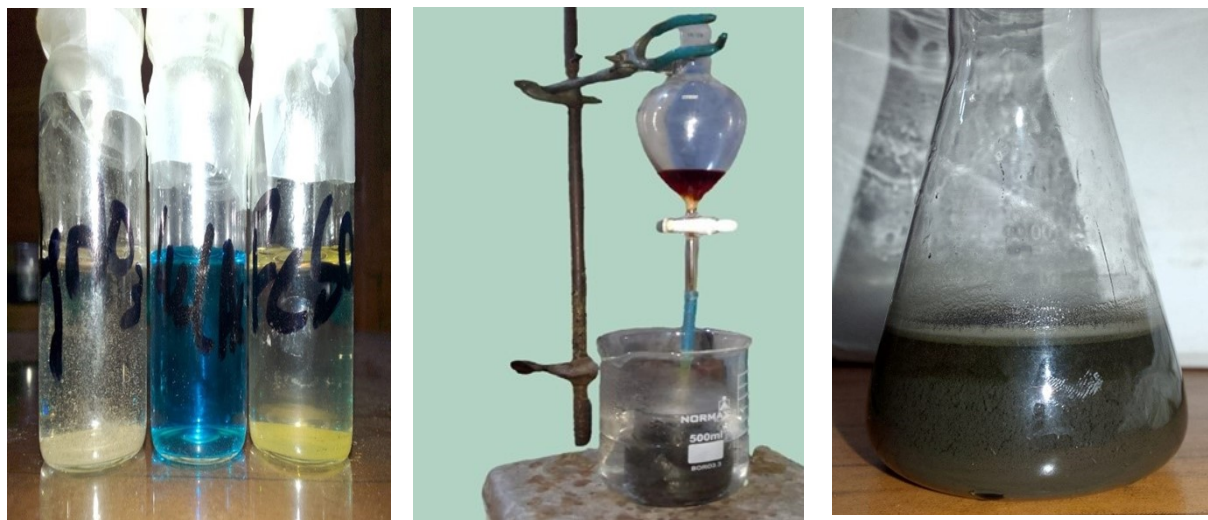

**Fig. S18 a)** Salts solutions **b)** addition of *Illicium verum* fruit extract and **c)** greyish green colored Ag/Fe/Cu-TNAs
